# Supplementary material for: An elevated temperature-dispersive liquid–liquid microextraction method combined with GC-flame ionization detection as a sensitive method for determining phthalate esters
Source: Royal Society of Chemistry journal article supplement (doi:10.1039/c4ay02998d), 2015-01-01
Supplement: c4ay02998d1.pdf [file c4ay02998d1.pdf]

## Supplementary data

**Development of an elevated temperature–dispersive liquid–liquid microextraction method combined with gas chromatography–flame ionization detection as a sensitive method for determining phthalate esters**

Mir Ali Farajzadeh<sup>\*,a</sup>, Samaneh Rezaee Aghdam<sup>a</sup>, Mohammad Reza Afshar Mogaddam<sup>a</sup>, Houshang Ghorbanpour<sup>b</sup>

<sup>a</sup>Department of Analytical Chemistry, Faculty of Chemistry, University of Tabriz, Tabriz, Iran

<sup>b</sup>Food and Drug Laboratories, Tabriz University of Medical Sciences, Tabriz, Iran

Running Head: ET-DLLME for PEs determination

Corresponding author:

E–mail address:mafarajzadeh@yahoo.com;mafarajzadeh@tabrizu.ac.ir

Fax: +98 41 33340191

Phone number: +98 41 33393084

## Results and discussion

### Selection of disperser solvent

In this study, disperser solvent should be a relatively high boiling point solvent. Therefore, DMF, DMSO, and *n*-propanol were tested as disperser solvents and the effect of these solvents on performance of the developed method was investigated. According to the results (Fig. S1), DMSO was selected as a suitable disperser because of forming a cloudy state with very fine droplets and having the high ERs for most analytes.

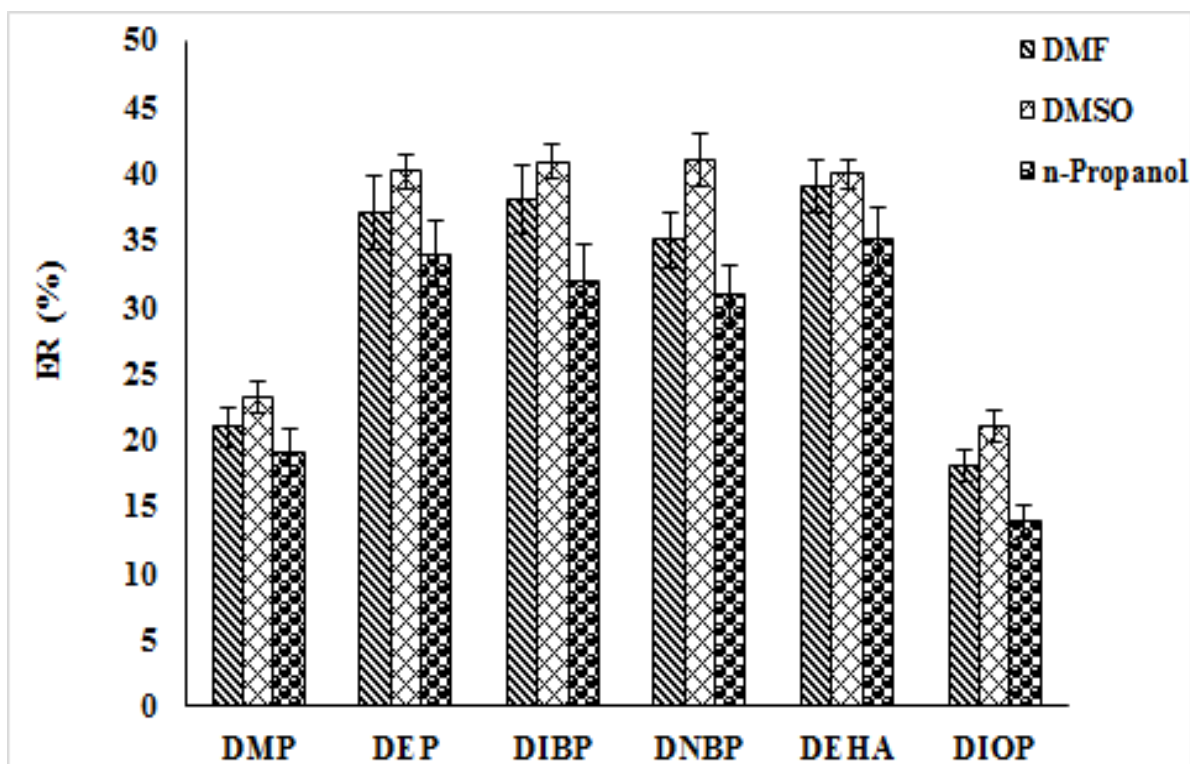

Fig. S1. Effect of chemical identity of the disperser solvent on the ET-DLLME performance.

Extraction conditions: aqueous sample, 50 mL de-ionized water spiked with 25 ng mL<sup>-1</sup> of each PE; extraction solvent, 1,2-DBE (110  $\mu$ L for DMF, 117  $\mu$ L for DMSO, and 125  $\mu$ L for *n*-propanol); disperser solvent volume, 2 mL; temperature, 75  $^{\circ}$ C, heating time, 5 min; centrifuge rate, 4000 rpm; and centrifuge time, 4 min. The error bars indicate the minimum and maximum of three independent determinations.

### Selection of extraction solvent volume

In order to investigate effect of extraction solvent volume on the extraction efficiency, different volumes of 1,2-DBE (117 to 170  $\mu\text{L}$ ) and a constant volume of DMSO (2 mL) were tested. According to the results (Fig. S2), 130  $\mu\text{L}$  of 1,2-DBE was selected to obtain 20  $\mu\text{L}$  for the sedimented phase volume, and having higher ERs.

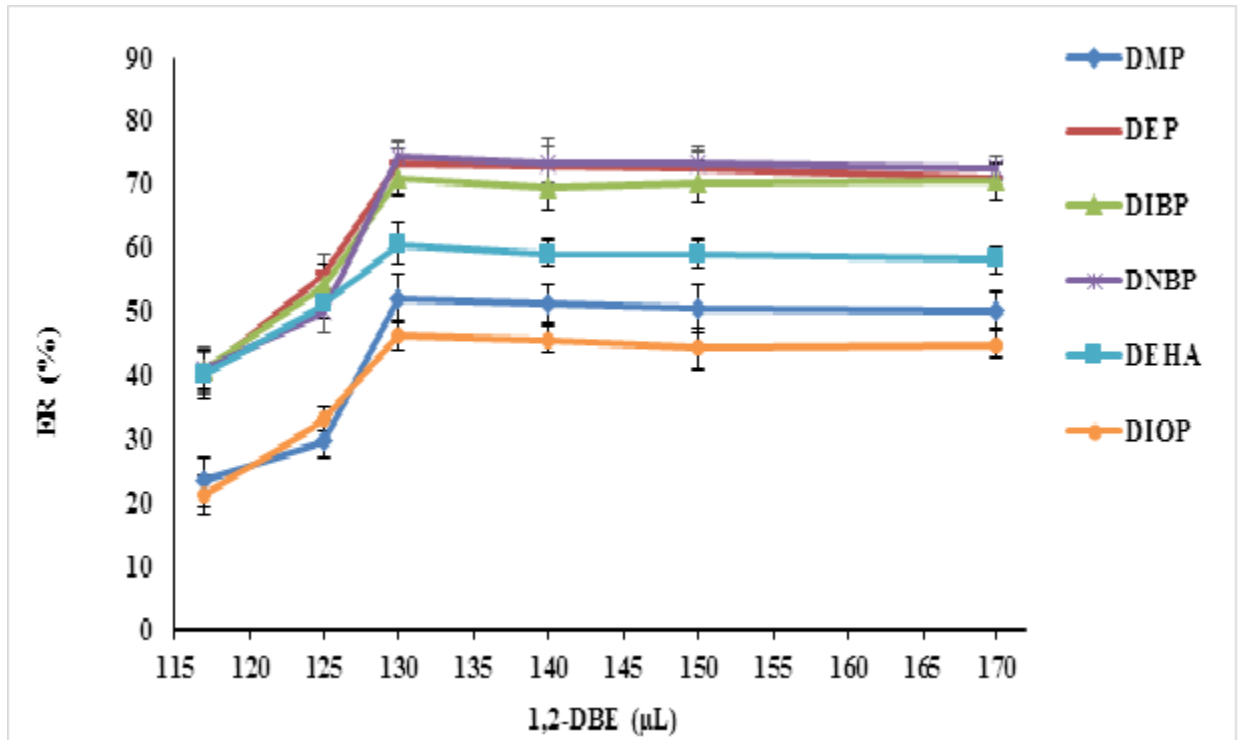

Fig. S2. Effect of extraction solvent (1,2-DBE) volume on ERs of the selected PEs.

Extraction conditions: the same as in Fig. S1 except DMSO (2 mL) was used as a disperser. The error bars indicate the minimum and maximum of three determinations.
